# Supplementary material
Source: MDPI journal article supplement (https://www.mdpi.com/2072-666X/6/9/1331)
Supplement: s1 [file s1]

## Supplementary Information

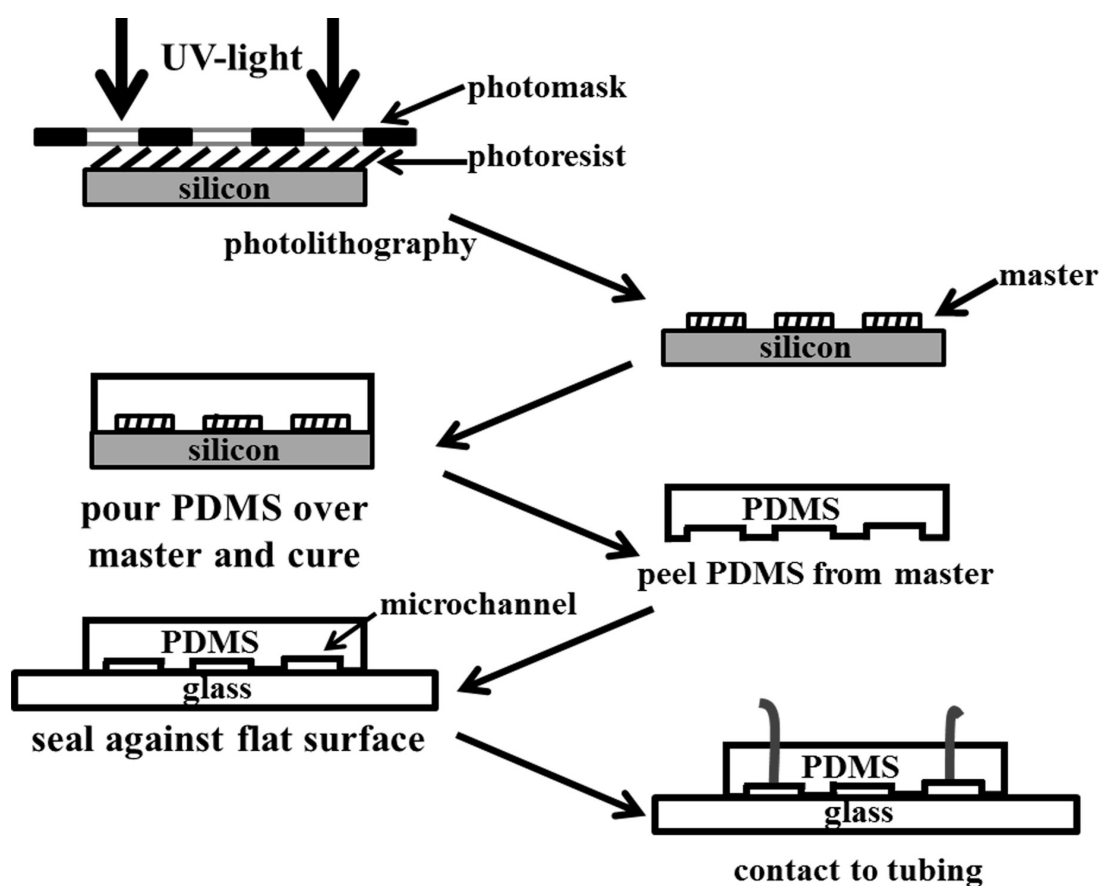

**Figure S1.** Schematic illustration of the poly(dimethylsiloxane) (PDMS)-based microfluidic device fabrication process.

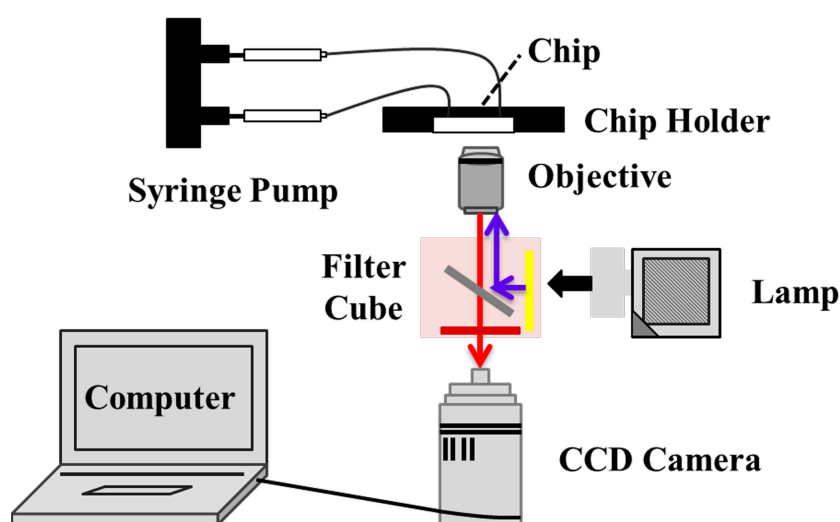

**Figure S2.** Schematic illustration of the experiment setup.

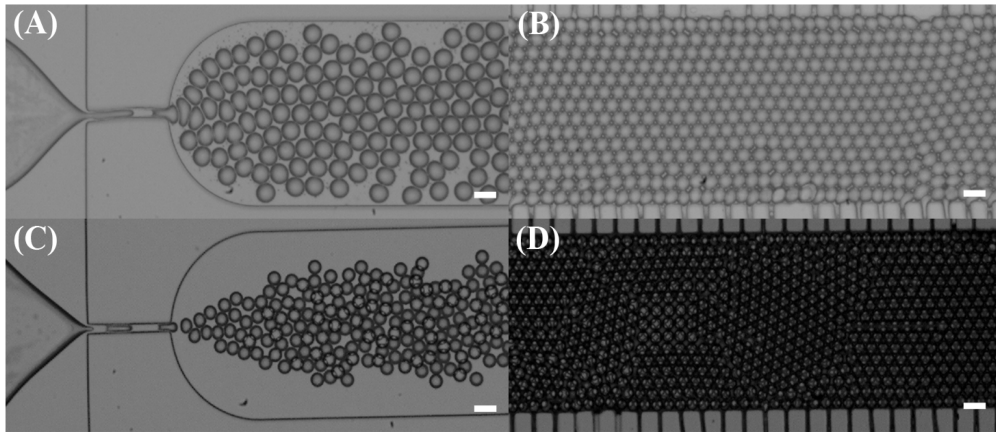

**Figure S3.** Optical microscopic images of the microdroplets fabrication and assembled 2D and 3D configurations in the PDMS-based flow-focusing microfluidic device with the characteristic size of  $w_f = 25 \mu\text{m}$ ,  $W_a = 400 \mu\text{m}$  and  $d_c = 40 \mu\text{m}$ . (A) and (C) are the images of droplets generation at the flow-focusing area; (B) and (D) are the microdroplets assembled arrangements in single-layer and double-layer, respectively.  $Q_o$  and  $Q_w$  were 50 and  $10 \mu\text{L}\cdot\text{h}^{-1}$  for (A) and (B), 60 and  $20 \mu\text{L}\cdot\text{h}^{-1}$  for (C) and (D). In (A) and (B), the oil phase was mineral oil with 21.2 wt % ABIL EM 90, and the aqueous phase was 9 wt % NIPAM, 2.3 wt % MBA and 2.0 wt % I 2959 dissolved in DI water. In (C) and (D) the oil phase was mineral oil with 11.2 wt % ABIL EM 90, and the aqueous phase consisted of 6 wt % NIPAM, 2.0 wt % MBA and 0.5 wt % I 2959. Scale bars are  $50 \mu\text{m}$ .

Movie S1: Microfluidic induced generation and assembly of microdroplets into controllable close-packed configurations.  $Q_o$  and  $Q_w$  were 600 and  $100 \mu\text{L}\cdot\text{h}^{-1}$ . Oil phase and Water phase were hexadecane with 2.7% (w/v) Span80 and DI water, respectively. The microfluidic device with the characteristic size of  $w_f = 25 \mu\text{m}$ ,  $W_a = 400 \mu\text{m}$  and  $d_c = 40 \mu\text{m}$  was used. (See the separate Movie S1.mpg).

© 2015 by the authors; licensee MDPI, Basel, Switzerland. This article is an open access article distributed under the terms and conditions of the Creative Commons Attribution license (<http://creativecommons.org/licenses/by/4.0/>).
